# Supplementary material for: Tomato and cotton G protein beta subunit mutants display constitutive autoimmune responses
Source: PubMed Central journal article supplement — Plant Direct. 2021 Nov 8;5(11):e359. doi: 10.1002/pld3.359 (PMC8573408; doi:10.1002/pld3.359), 2021-11-08
Supplement: PLD3-5-e359-s002.pdf [file PLD3-5-e359-s002.pdf]

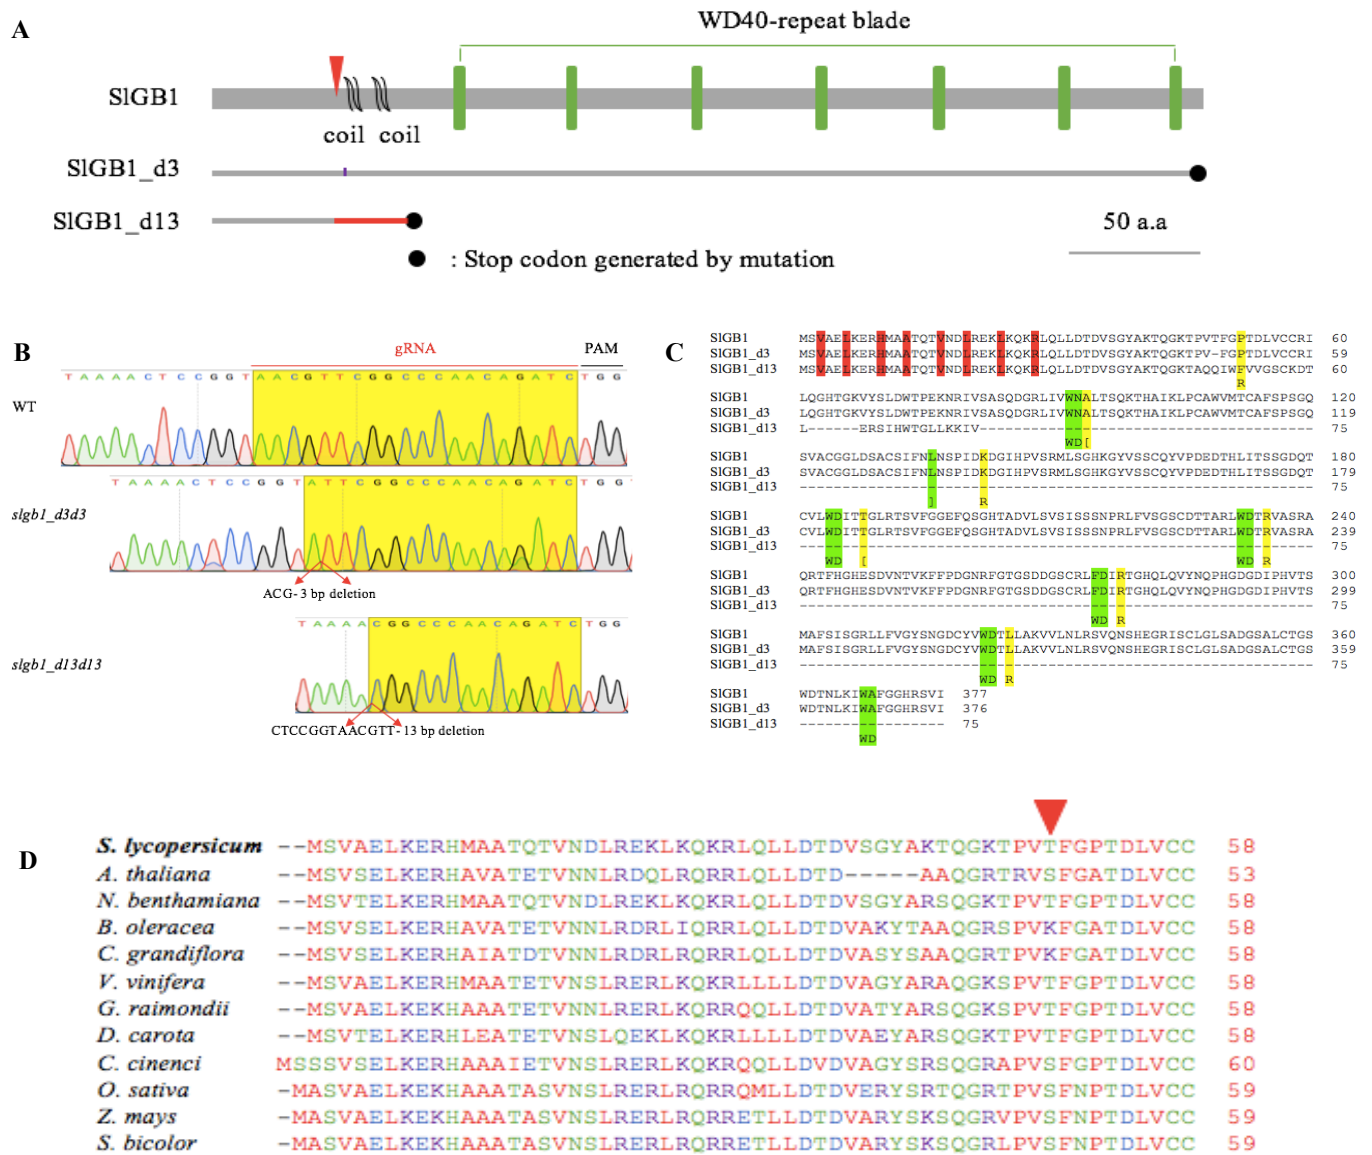

**Fig.S1** Characterization of CRISPR/Cas9 *slgb1* mutants in tomato. (A) Schematic diagram of the wild type (WT) and mutated S1GB1 proteins. Upper row, WT S1GB1 protein indicating the position of the mutation (red arrow) upstream of the coil-coiled domain. Middle row, mutated S1GB1\_d3 protein encoded by the three bp-deletion mutation. The deletion of three bases results in the omission of a threonine amino acid (a.a) in position 49 indicated by the purple mark. Lower row, mutated S1GB1\_d13 protein encoded by the 13 bp-deletion mutation. The deletion of 13 bases produces a frameshift that interrupts the canonical sequence of the protein at position 47 adding an unrelated peptide of 28 a.a before encountering a translational stop codon. In S1GB1\_d3 and S1GB1\_d13, grey lines indicate native S1GB1 sequences, the red line indicates unrelated peptide. (B) Sanger sequencing of PCR amplicons from WT and two homozygous mutant lines *slgb1\_d3d3* and *slgb1\_d13d13* show three bases and 13 bases deletions, respectively. (C) Amino acid sequences of WT and mutated S1GB1 proteins. Eight residues important for interaction with  $\gamma_7$  are highlighted in red. WD-40 repeat domains starts and ends are highlighted in green and yellow, respectively. (D) The threonine amino acid in position 49 of the S1GB1 protein indicated by a red arrow is not conserved among plant  $\beta$  subunits.

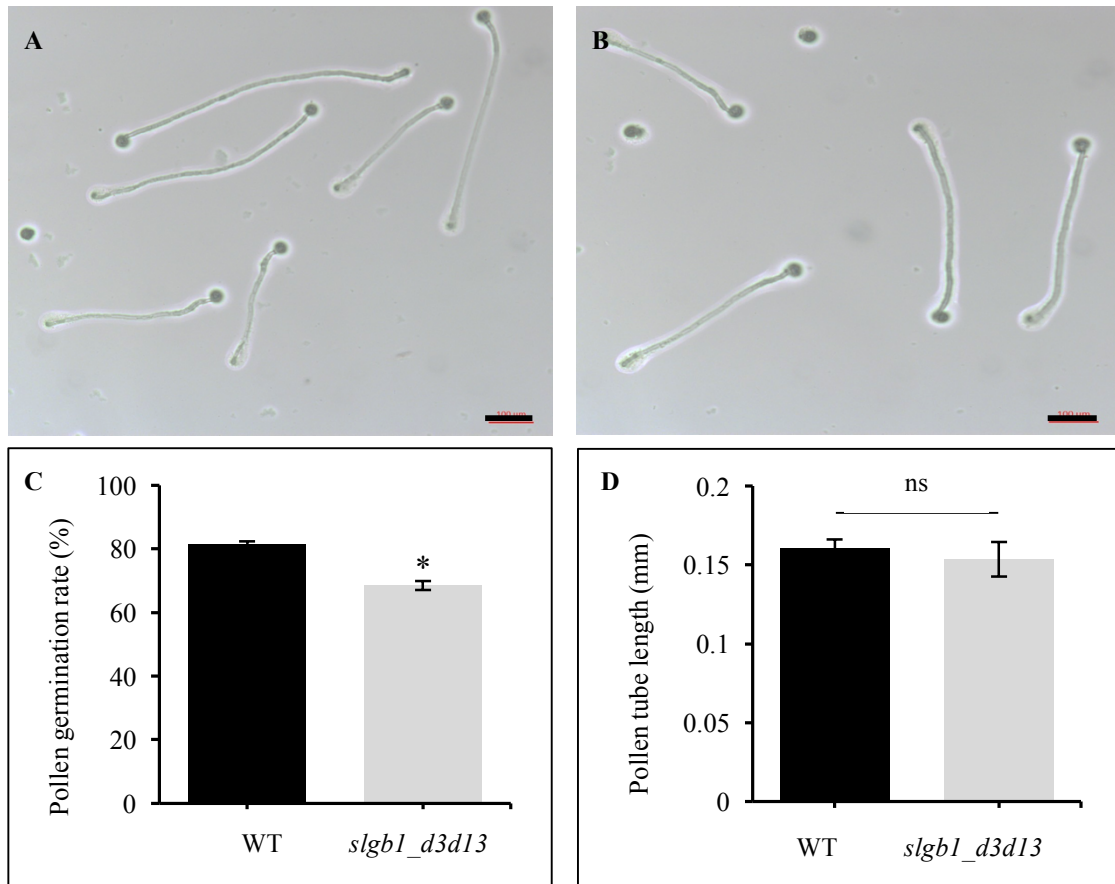

**Fig. S2** *In vitro* pollen germination assay. Tomato pollen grains derived from (A) WT and (B) biallelic *slgb1\_d3d13* plants were germinated on a solid germination medium. Pictures were taken 24 h after incubation. Scale bars = 100  $\mu\text{m}$ . (C) Pollen germination rate and (D) average pollen tube length from WT and *slgb1\_d3d13* plants were measured after incubation for 24 h. In C, bars represent averaged values from three independent experiments with standard errors. Asterisk indicates statistically significant difference evaluated by Student's t-test, \*  $P < 0.05$ . In D, bars represent means  $\pm$  SEM,  $n \geq 65$ . "ns" indicates no significant difference ( $P > 0.05$ ) by Student's t-test.

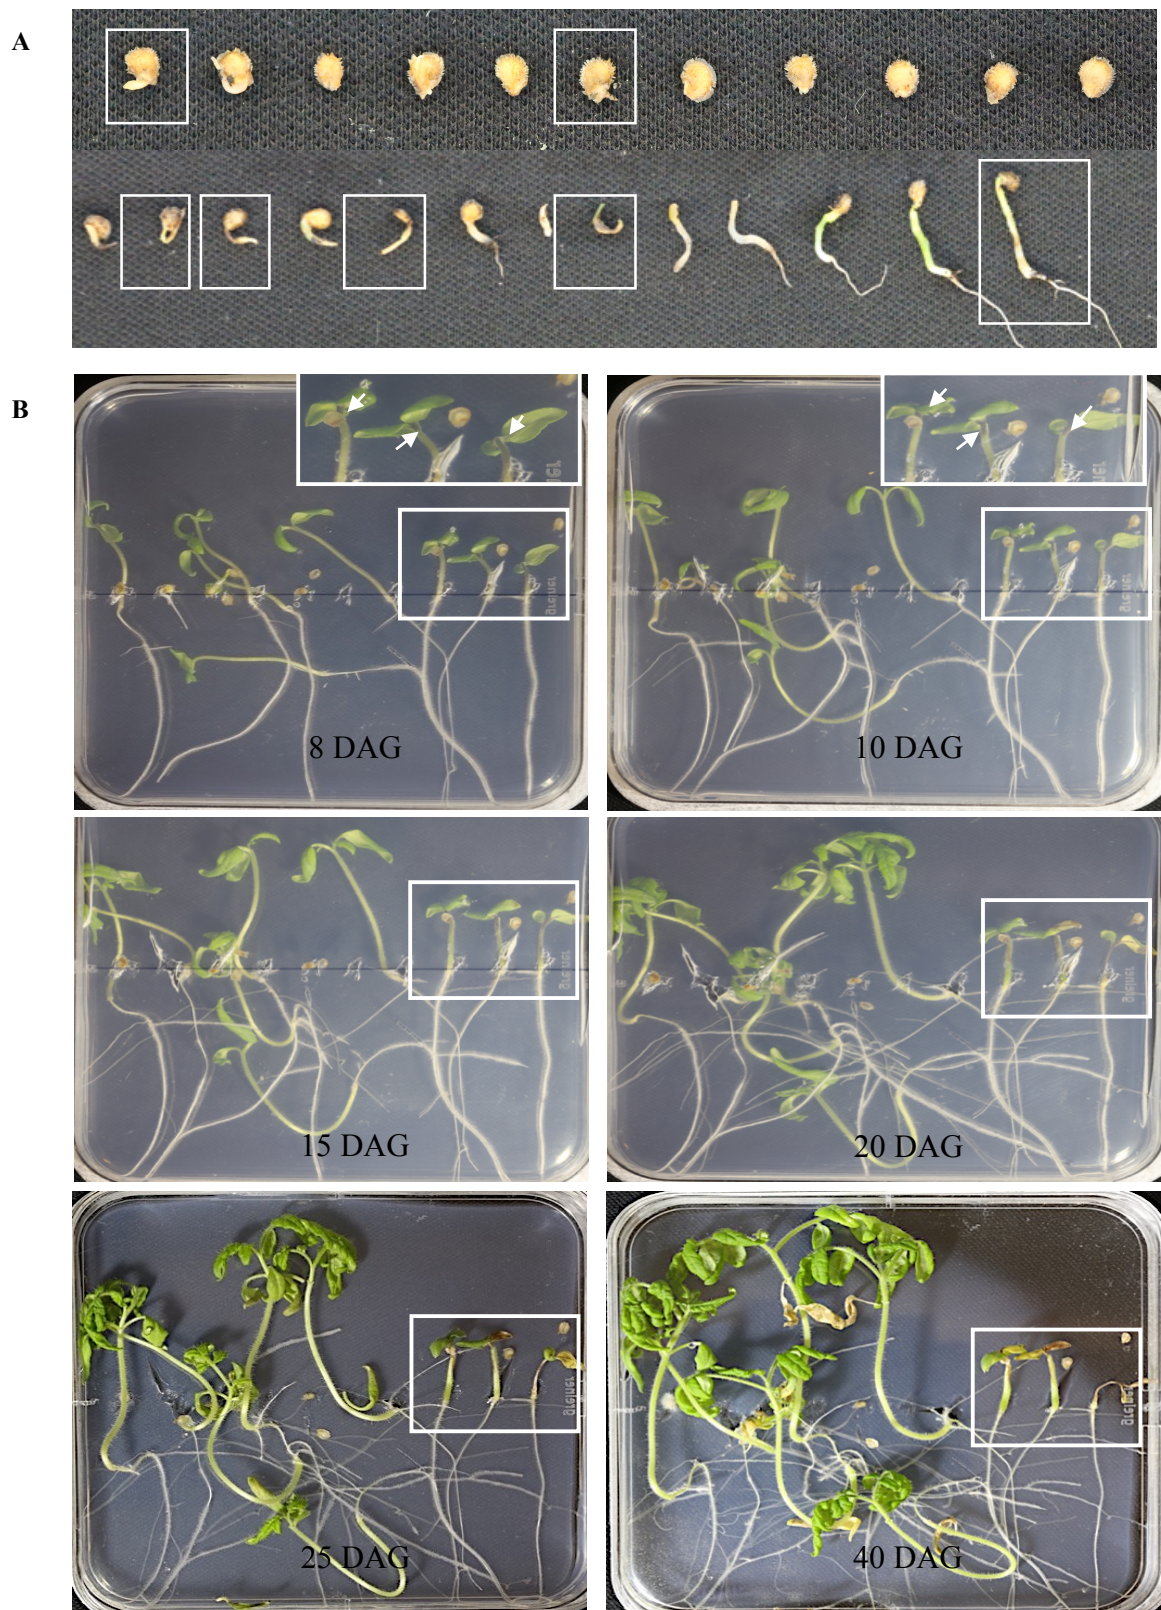

**Fig. S3** Homozygous *slgb1\_d13d13* mutants exhibit seedling lethality. (A) Non-germinated seeds and defective germination and growth seedlings from self-pollinated heterozygous *slgb1\_d13wt* plants two weeks after sowing on soil. (B) Seedlings from self-pollinated *slgb1\_d13wt* plants were germinated on MS medium containing 1% (w/v) sucrose. White boxes show homozygous *slgb1\_d13d13* seeds/seedlings identified by Sanger sequencing of the targeted genomic region. DAG, days after germination.



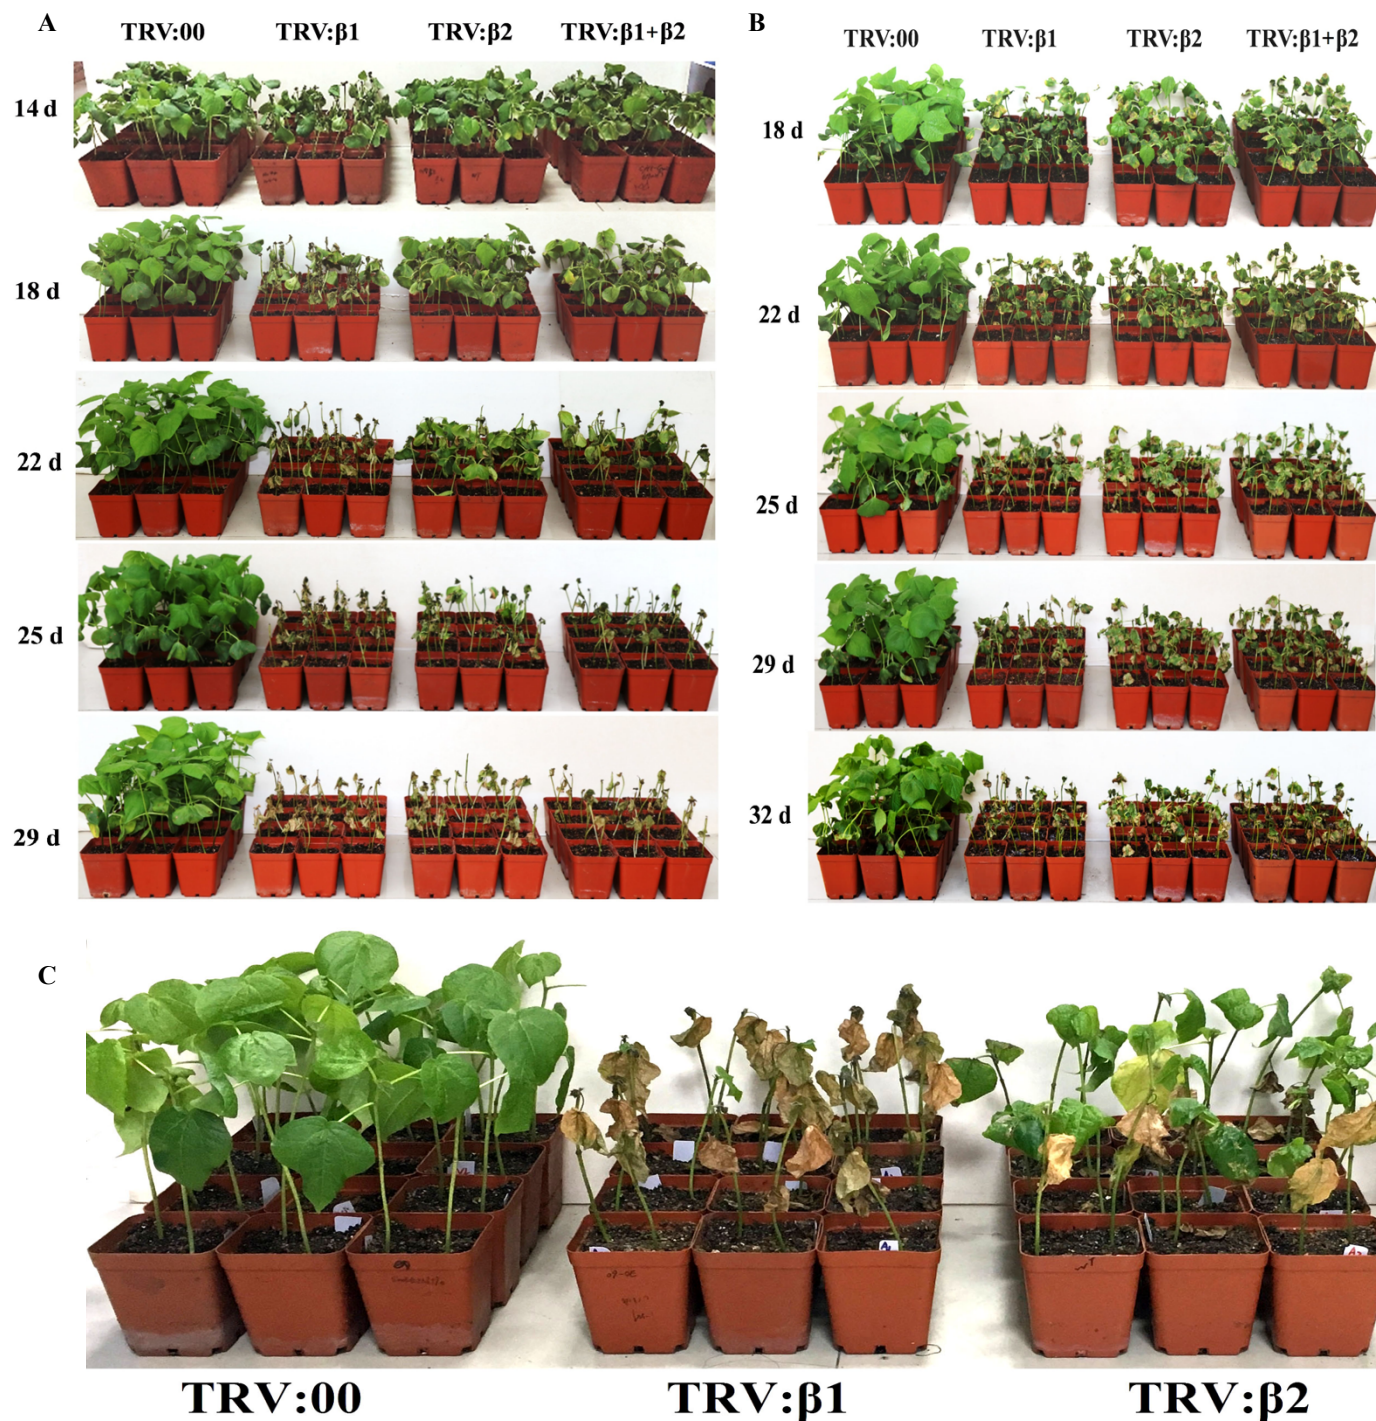

**Fig. S5** Silencing of *GhGB1* and *GhGB2* causes plant death in the upland cotton cultivar (A) ‘TM1’, (B) ‘Coker201’ and (C) the sea-island (*Gossypium barbadense*) cotton cultivar ‘Hai7124’. (A and B) Plants were infiltrated with *A. tumefaciens* strain GV3101 carrying TRV:00, TRV:β1, TRV:β2 or TRV:β1+TRV:β2 vectors. Pictures were taken 14-32 days after infiltration. (C) Plants were infiltrated with *A. tumefaciens* strain GV3101 carrying TRV:00, TRV:β1 or TRV:β2 vectors. Pictures were taken 35 days after infiltration.

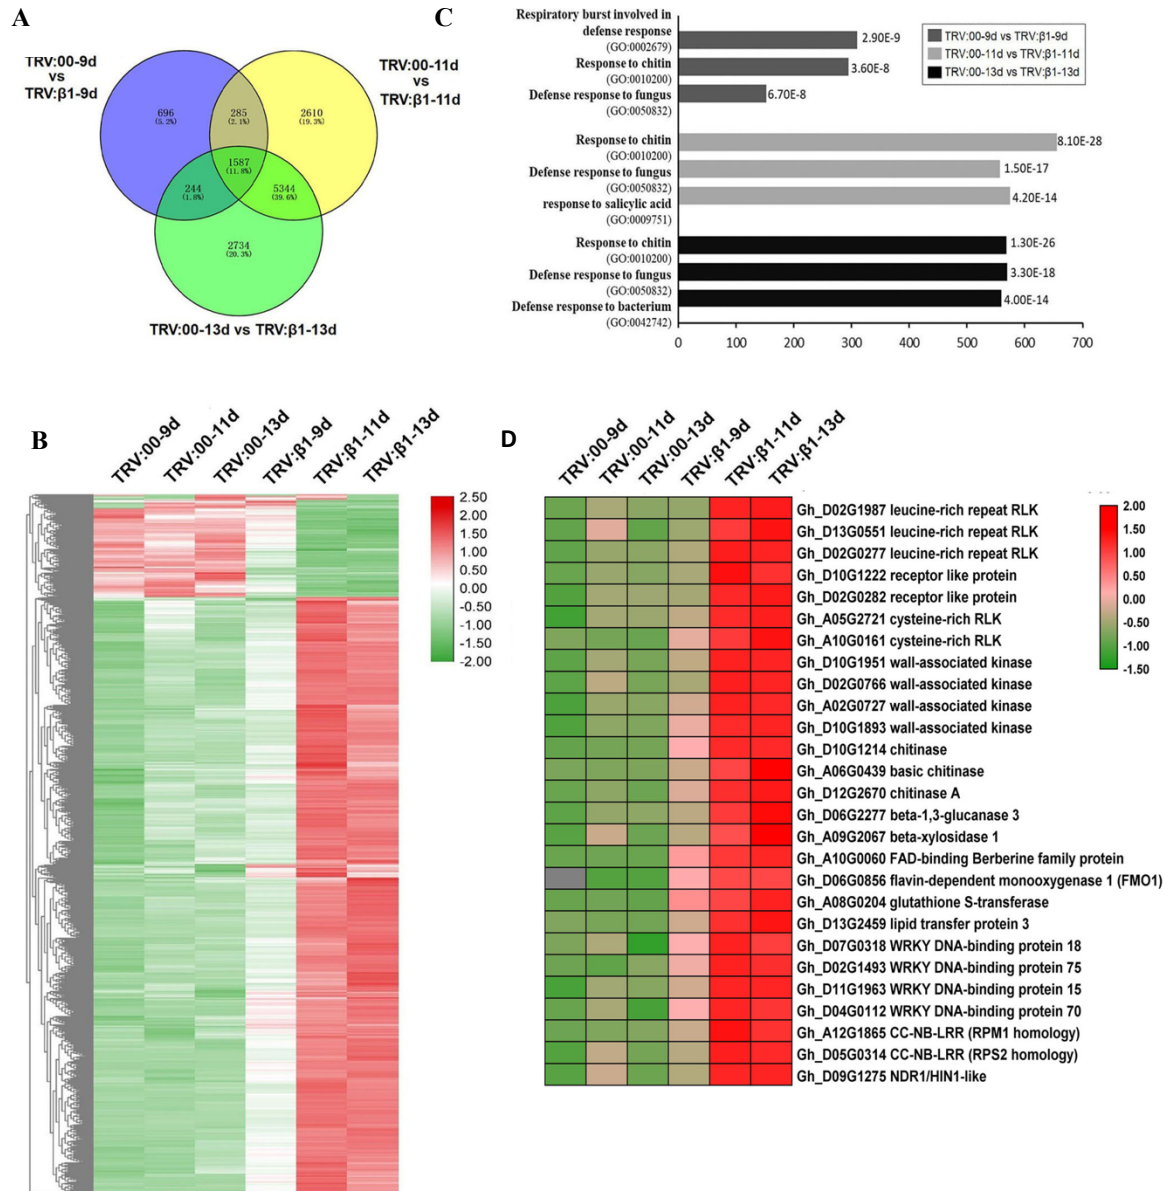

**Fig. S6** Transcriptome analysis of G $\beta$ -silenced cotton plants. (A) Venn diagram of differentially expressed gene (DEGs) in the leaves of cotton plants infiltrated with TRV: $\beta$ 1 compared with TRV:00, 9, 11 and 13 d after VIGS infiltration. (B) Heat-map showing the expression changes of all DEGs in both three groups of samples (TRV: $\beta$ 1 and TRV:00; 9 d, 11 d and 13 d). (C) The TOP3 enrichment GO groups of the DEGs (TRV: $\beta$ 1 vs TRV:00) in 9 d, 11 d or 13 d samples. The bottom (X-axis) is the gene numbers enriched in each term, and next to the bar (right) is the significance. (D) Heat-map of a part of the upregulated genes in both three groups of samples (TRV: $\beta$ 1 and TRV:00; 9 d, 11 d and 13 d). For (B) and (D), The FPKM value of DEGs are shown by a color gradient from low (green) to high (red). The scale bar stand for the  $\log_2$  fold changes in transcription level.

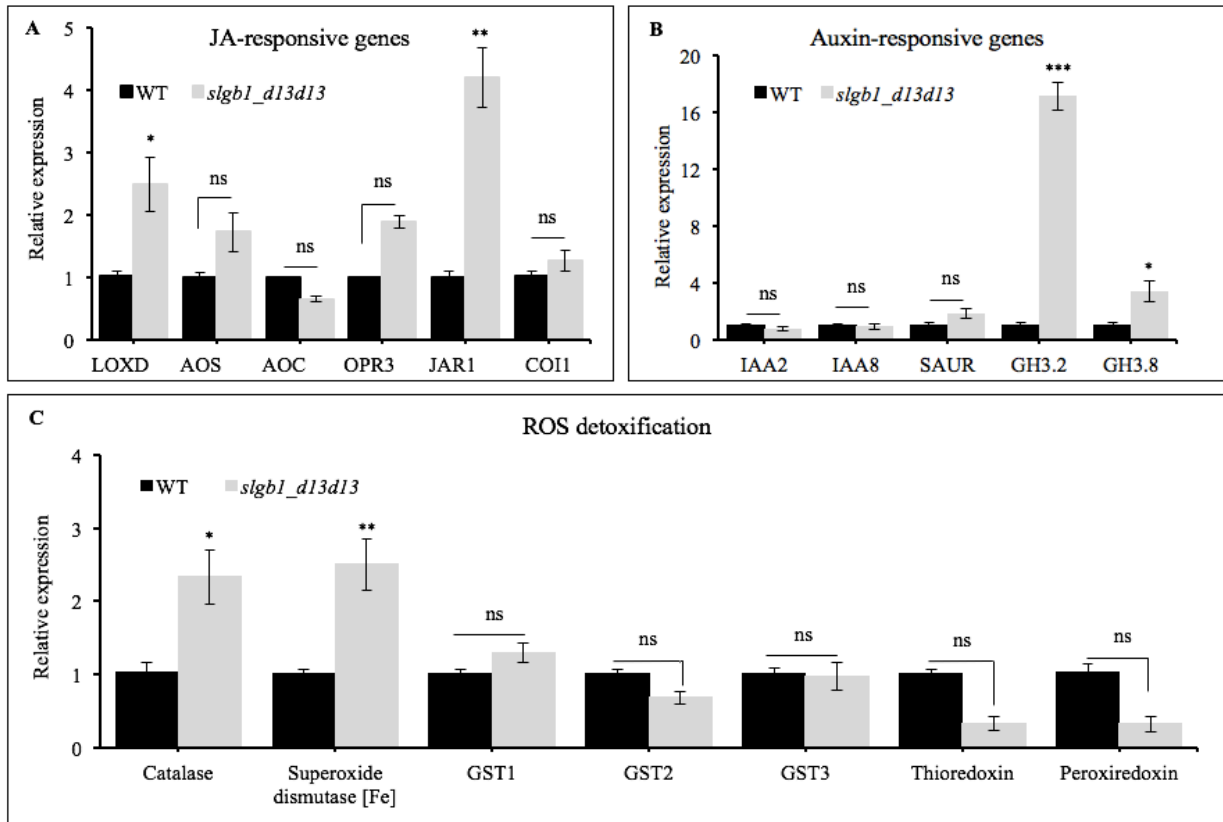

**Fig. S7** Expression of key genes involved in Jasmonic acid (JA)-, auxin- and ROS detoxification- signaling pathways is altered in homozygous *slgb1\_d13d13* mutants. qRT-PCR was performed to measure relative expression levels of (A) JA-responsive genes, (B) auxin-responsive genes and (C) genes related to ROS detoxification in two-week-old WT and *slgb1\_d13d13* tomato seedlings grown on MS medium. Gene expression was normalized to the tomato *Ubiquitin 3 (SIUB3)*. Bars represent means  $\pm$  SEM,  $n \geq 3$ . Asterisks indicates significant difference evaluated by Student's t-test, \*  $P < 0.05$ , \*\*  $P < 0.01$ , \*\*\*  $P < 0.001$ . "ns" indicates no significant difference.

**Table S1** Characterization of CRISPR/Cas9-targeted mutations in the T0 generation

| T0 line | The sequence of target site               | Genotype | Zygoty      | Note                   |
|---------|-------------------------------------------|----------|-------------|------------------------|
| # 13    | ACTCCGGTAACGTTTCGGCCCCAACAGATC <u>TGG</u> | WT       | Monoallelic | No seeds were obtained |
|         | ACTCCGGTAACGTTTCGGCCCCAACAAATC <u>TGG</u> | s1       |             |                        |
| # 18    | ACTCCGGTA---TTCGGCCCCAACAGATC <u>TGG</u>  | d3       | Biallelic   |                        |
|         | A-----CGGCCAACAGATC <u>TGG</u>            | d13      |             |                        |
| # 24    | ACTCCGGTA---TTCGGCCCCAACAGATC <u>TGG</u>  | d4       | Biallelic   | No seeds were obtained |
|         | ACTCCGGTA-----GGCCAACAGATC <u>TGG</u>     | d6       |             |                        |

WT, wild type-no mutation was detected at target site; s#, # number of bases substituted at target site; d#, # number of bp deleted at target site. PAM sequence (TGG) is indicated in red and underlined; the 20 bp target sequence is marked in green, the base highlighted yellow means substitution.

**Table S2** The differentially expressed genes in both three groups of samples (TRV:00 and TRV:β1; 9 d, 11 d and 13 d after VIGS infiltration) (see separate Excel file)

**Table S3** Part of the upregulated genes in both three groups of samples (TRV:00 and TRV:β1; 9 d, 11 d and 13 d after VIGS infiltration) (see separate Excel file)

**Table S4** Part of the upregulated genes in both three groups of samples (TRV:00 and TRV:β1; 9 d, 11 d and 13 d after VIGS infiltration) (see separate Excel file)

**Table S5** List of primer sequences

| Name                                                       | Gene ID                           | Forward primer                                         | Reverse primer                                       | Reference     |
|------------------------------------------------------------|-----------------------------------|--------------------------------------------------------|------------------------------------------------------|---------------|
| <b>Primers used for VIGS vector construction in cotton</b> |                                   |                                                        |                                                      |               |
| GhGB1                                                      | Gohir.A03G194000/Gohir.D02G215100 | CGACGACAAGACCCTGGT<br>CAATCAGTTGCCTGTGGT               | GAGGAGAAGAGCCCTGTCA<br>AACAACCTACAAGTCCCAT<br>C      | In this study |
| GhGB2                                                      | Gohir.A13G034700                  | CGACGACAAGACCCTAAC<br>TACTGTTTTCGGGGAGA                | GAGGAGAAGAGCCCTTACC<br>ATCGGCTGACAAACCC              | In this study |
| GhEDS1                                                     | Gh_A12G1816                       | AGAAGGCCTCCATGGGG<br>ATCCTGGAACAAACAGGA<br>ATATGGGATG  | GAGACGCGTGAGCTCGGTA<br>CCTATCCACCATTTGGTAA<br>AGGAGG | In this study |
| GhEDS5                                                     | Gh_A03G1749                       | AGAAGGCCTCCATGGGG<br>ATCCTTCGTTGTGCGACC<br>GAGTAA      | GAGACGCGTGAGCTCGGTA<br>CCAATAAGCCACCAGTCAA<br>ACCAAC | In this study |
| GhPAD4                                                     | Gh_A05G3304                       | AGAAGGCCTCCATGGGG<br>ATCCTAGAAATCTGGTGG<br>CTTTGAGTAAG | GAGACGCGTGAGCTCGGTA<br>CCCGAGCAATGGAGAACCG<br>AAT    | In this study |
| GhSAG101                                                   | Gh_D07G2218                       | AGAAGGCCTCCATGGGG                                      | GAGACGCGTGAGCTCGGTA                                  | In this study |



|                                           |                    |                                                    |                                                    |                           |
|-------------------------------------------|--------------------|----------------------------------------------------|----------------------------------------------------|---------------------------|
|                                           |                    | ATCCGGACAGTTAATGTT<br>TACAGCAGGAT                  | CCTCGTACCAGCATAACAAC<br>CACC                       |                           |
| GhSID2                                    | Gh_D05G3199        | AGAAGGCCTCCATGGGG<br>ATCCTGCCCCGTAGCAGCA<br>GGATT  | AGAAGGCCTCCATGGGGAT<br>CCTGCCCCGTAGCAGCAGGA<br>TT  | In this study             |
| GhEIN2                                    | Gh_D09G1403        | AGAAGGCCTCCATGGGG<br>ATCCTTTAGGAGCCTCAG<br>CGGGA   | AGAAGGCCTCCATGGGGAT<br>CCTTTAGGAGCCTCAGCGG<br>GA   | In this study             |
| GhRbohD                                   | Gh_D05G2471        | AGAAGGCCTCCATGGGG<br>ATCCTTACTGGGTGACAA<br>GGGAGCA | GAGACGCGTGAGCTCGGTA<br>CCGTTAGGCTTGCCGAAGT<br>GAGA | In this study             |
| GhRbohF                                   | Gh_D03G0688        | AGAAGGCCTCCATGGGG<br>ATCCTGTCCAGTGCCCTG<br>CTGTCT  | AGAAGGCCTCCATGGGGAT<br>CCTGTCCAGTGCCCTGCTG<br>TCT  | In this study             |
| <b>Primers used for qRT-PCR in tomato</b> |                    |                                                    |                                                    |                           |
| SIUB3                                     | Solyc07g064130.1.1 | GCCGACTACAACATCCAG<br>AAGG                         | TGCAACACAGCGAGCTTAA<br>CC                          | Ricardi et al.<br>(2010)  |
| SIGB1                                     | Solyc01g109560.2.1 | TACTCGACACCGATGTTT<br>CTGG                         | AGACCTTCCAGTGTGTCC<br>T                            | In this study             |
| SIPR1b1                                   | Solyc00g174340.1.1 | GCCAAGCTATAACTACGC<br>TACCAAC                      | GCAAGAAATGAACCACCAT<br>CC                          | Song et al.<br>(2010)     |
| SIPR1a2                                   | Solyc09g007020.1.1 | CTTGAGGTTACAACGAC<br>GC                            | CCCGCTTTGAGTTGGCAT<br>A                            | In this study             |
| SIPR2                                     | Solyc01g060020.2.1 | CCAACATTCACATAACAG<br>AGGCT                        | TAGCGCATTCAAAGCTCCA<br>TGA                         | In this study             |
| SIPR3                                     | Solyc10g055810.1.1 | AACTATGGGCCATGTGGA<br>AGA                          | GGCTTTGGGGATTGAGGAG                                | Song et al.<br>(2010)     |
| SIPR4                                     | Solyc01g097240.2.1 | AGATGCTTGAGGGTGACC<br>AAC                          | GTTTCCCCTCTGATAGCCC<br>A                           | In this study             |
| SIPR5                                     | Solyc08g080640.1.1 | GCAACAACGTCCATACA<br>CC                            | AGACTCCACCACAATCACC                                | Molinari et al.<br>(2014) |
| SIPAD4                                    | Solyc02g032850.2.1 | GAACTCGCAACCTCAACA<br>GC                           | TCGAGGCACCTCTTTGCTT<br>G                           | In this study             |
| SIEDS1                                    | Solyc06g071280.2.1 | TAGGGACACAGTTTCGCA<br>GG                           | TGCCAGAAACAAGACTCG<br>G                            | In this study             |
| SINPR1                                    | Solyc07g040690.2.1 | GGTCGACAAGTTTCAGAG<br>ACACC                        | TGAGGCAAGGACTTATCAA<br>GGG                         | In this study             |
| SIETR4                                    | Solyc06g053710.2.1 | CGTGAATAGAGCGGTAAC<br>AAGTAAG                      | CAGGGCTAAGAACACCAAT<br>ACA                         | Martínez<br>(2018)        |
| SICTR1                                    | Solyc10g083610.1.1 | GCATATCCCCTAGTTGCA<br>TCAC                         | CATGGAAACCAGTTCCTCT<br>TCT                         | Martínez<br>(2018)        |
| SICTR2                                    | Solyc01g097980.2.1 | TGCAAGCTCAGTCAATAG<br>GAAC                         | ACCAACATCATCAAACACA<br>GGA                         | Martínez<br>(2018)        |
| SIEIN2                                    | Solyc09g007870.2.1 | CTTGCGCAGATTTGCAGT<br>GA                           | CCGGTTGCAGTCAGGAAAA<br>C                           | In this study             |
| SIERF1a                                   | Solyc05g052050.1.1 | CTCTAAGCGTCGGATGGT<br>CG                           | GACGCTGTCTAACGCCTCT<br>A                           | In this study             |
| SIERF1b                                   | Solyc06g082590.1.1 | GCTTTGTCACCCACCTCA<br>GT                           | CCGTCATAGCAAAATCCGG<br>C                           | In this study             |
| SIRbohB                                   | Solyc03g117980.2.1 | AGGGAATGATAGAGCGT<br>CG                            | CATCGTCATTGGACTTGGC                                | Li et al.<br>(2015)       |
| SIRbohD                                   | Solyc06g068680.2.1 | CCTCCTACACCACCAAAT                                 | GCCCAGTGCTTCAATCTCT                                | Li et al.                 |

|                                           |                                       |                                   |                               |                       |
|-------------------------------------------|---------------------------------------|-----------------------------------|-------------------------------|-----------------------|
|                                           |                                       | C                                 |                               | (2015)                |
| SIRbohF                                   | Solyc07g042460.1.1                    | CCTTATCTGCACGAGAGG<br>AAAT        | CAGCACATTTGTGTCAGAT<br>TCC    | Li et al.<br>(2015)   |
| SICAT3                                    | Solyc04g082460.2.1                    | TGCAGCTCCCAGTTAATG<br>CT          | CCGCATGACGACAAGGATC<br>A      | In this study         |
| SISDF                                     | Solyc06g048410.2.1                    | GGATACACACCACTCCTC<br>ACC         | TGACTGCTTCCCATGACAC<br>C      | In this study         |
| SIGST1                                    | Solyc06g009020.2.1                    | AGTCGTGGCAGAGAACG<br>AAG          | CTCCCCGACAAGTAGTGCA<br>A      | In this study         |
| SIGST2                                    | Solyc09g074850.2.1                    | TGATTGGCTTGGGCAGTA<br>CC          | GTAAGGAGTCGCCACCCA<br>A       | In this study         |
| SIGST3                                    | Solyc06g009040.2.1                    | TGCTGACAAGGGGAACC<br>AAC          | CTTCGTTCTCCGCCACGATT          | In this study         |
| SITHIO<br>(Thioredoxin)                   | Solyc05g006830.2.1                    | TCACACCACAAAGCAAG<br>AGGT         | TGCAAGGACCACACCATGT<br>A      | In this study         |
| SIPERO<br>(Peroxiredoxin)                 | Solyc03g096040.2.1                    | TTCACATCGTGGGACCTG<br>AC          | GGTCTCCCGGTTTCCAGTT           | In this study         |
| SILOXD                                    | Solyc03g122340.2.1                    | GGCTTGCTTTACTCCTGG<br>TC          | AAATCAAAGCGCCAGTTCT<br>T      | Sun et al.<br>(2017)  |
| SIAOS                                     | Solyc03g120500.2.1                    | CGATTACCTCCGATTCTG<br>GT          | AAATCTTCATCCCACCGAA<br>G      | Sun et al.<br>(2017)  |
| SIAOC                                     | Solyc02g085730.2.1                    | CAGCAGGACTCTGCATTC<br>TG          | CGGTGACGGCTAGGTAAGT<br>T      | Sun et al.<br>(2017)  |
| SIOPR3                                    | Solyc07g007870.2.1                    | ATGTTGGTCGTGCATCTC<br>AT          | GGTCCAATTGCTCTTGTT            | Sun et al.<br>(2017)  |
| SIJAR1                                    | Solyc10g011660.2.1                    | CTAAGCCATTTATAAGAA<br>AGGAGGG     | CTGCCATTCAGACCCCAT<br>G       | In this study         |
| SICOI1                                    | Solyc05g052620.2.1                    | GTGCGGTTACACACAGAG<br>GA          | CTGTCAAGCAAACCAGCC<br>G       | In this study         |
| SIIAA2                                    | Solyc06g084070.2.1                    | TAACAATGATGAACCACC<br>AC          | TTCCTTAAATAAGCCGCA<br>C       | Deng et al.<br>(2012) |
| SIIAA8                                    | Solyc03g120390.2.1                    | CCTAACAATCTGTAATTC<br>TCAAAGTGAAA | GCATCCAGTCTCCATCTTA<br>TCTTC  | Deng et al.<br>(2012) |
| SISAUR                                    | Solyc01g110920.2.1                    | ATGTTGGGGAAAAGCAG<br>AAG          | ACCCATCGGATGATTAAG<br>C       | In this study         |
| SIGH3.2                                   | Solyc01g107390.2.1                    | GTGAACTTTGCACCTATT                | AAACACTTCTCCTCCTCT            | Liao et al.<br>(2015) |
| SIGH3.4                                   | Solyc02g092820.2.1                    | CTCCAGGGTGATTTCTGT                | TTCTTTGGTCCACTGTCT            | Liao et al.<br>(2015) |
| <b>Primers used for qRT-PCR in cotton</b> |                                       |                                   |                               |                       |
| GhUBI7                                    | Gh_A12G1102                           | GAAGGCATTCCACCTGAC<br>CAAC        | CTTGACCTTCTTCTTGT<br>GCTTG    | In this study         |
| GhGB1                                     | Gohir.A03G194000/Go<br>hir.D02G215100 | GCCTTGTGCGTGGGTTAT<br>GAC         | AAACCGATGTTCTAAGGCC<br>AGTAG  | In this study         |
| GhGB2                                     | Gohir.A13G034700                      | CACCAGAACGAGATCGA<br>ATTGTC       | ATAGCCCTTGCGCCATTA<br>AGG     | In this study         |
| GhPAD4                                    | Gh_A05G3304                           | GAGTCAACATTAACCGCC<br>ATAGAC      | GAGTCAACATTAACCGCCA<br>TAGAC  | In this study         |
| GhEDS1                                    | Gh_A12G1816                           | GCCGATGCTATTCTTCAA<br>CTACT       | GATCTCATCCCATATTCCTG<br>TTAGT | In this study         |
| GhEDS5                                    | Gh_A03G1749                           | TTCGTTGTGCGACCGAGT<br>AA          | TTCGTTGTGCGACCGAGTA<br>A      | In this study         |

|          |             |                            |                              |                     |
|----------|-------------|----------------------------|------------------------------|---------------------|
| GhSAG101 | Gh_D07G2218 | CTCCGATCACGGTGGTTG<br>TAT  | GAGGCTCAATAAGCATCTC<br>ATACT | In this study       |
| GhSID2   | Gh_D05G3199 | TGCCCCGTAGCAGCAGGAT<br>T   | AACTGCTGGAGTTGGGTGG<br>AG    | In this study       |
| GhAOC4   | Gh_A12G1551 | GGCATCACGGCTGGACTC<br>T    | GCGATGGTGGCACTGGC            | In this study       |
| GhEIN2   | Gh_D09G1403 | TTTTGATCTGGTAGCCCC<br>C    | CAATATGAAACCTGCCGCA<br>T     | In this study       |
| GhERF1   | Gh_A08G1686 | CGCAGCGGAGATAAGGG<br>A     | CCTAAATCCTCAAACACCA<br>CCA   | In this study       |
| GhRbohD  | Gh_D05G2471 | TTACTGGGTGACAAGGGA<br>GCA  | TTACTGGGTGACAAGGGAG<br>CA    | In this study       |
| GhRbohF  | Gh_D03G0688 | TGTCCAGTGCCCTGCTGT<br>CT   | TTTGAACCAATCAAATGAA<br>CCTTG | In this study       |
| GhPR1    | Gh_A12G0274 | ACCTCAACGCTCACAACA<br>CA   | GGTCCACTGGAGTGCACAA<br>G     | Du et al.<br>(2017) |
| GhPR4    | Gh_D13G1816 | CCGAGAACAATAAAGTGG<br>GACT | AGCCCTCCATTGCTACATT<br>GAT   | In this study       |
| GhPR5    | Gh_A12G2071 | GGACCATCGATGTGCCTG<br>C    | CACCCCAACCTTGCATTG<br>A      | Du et al.<br>(2017) |

## References

- Deng W, Yan F, Liu M, Wang X, Li Z** (2012) Down-regulation of *SlIAA15* in tomato altered stem xylem development and production of volatile compounds in leaf exudates. *Plant Signaling & Behavior* **7**: 911-913
- Du X, Wang S, Gao F, Zhang L, Zhao JH, Guo HS, Hua C** (2017) Expression of pathogenesis-related genes in cotton roots in response to *Verticillium dahliae* PAMP molecules. *Science China Life sciences* **60**: 852-860
- Li X, Zhang H, Tian L, Huang L, Liu S, Li D, Song F** (2015) Tomato SIRbohB, a member of the NADPH oxidase family, is required for disease resistance against *Botrytis cinerea* and tolerance to drought stress. *Frontiers in Plant Science* **6**: 463
- Liao D, Chen X, Chen A, Wang H, Liu J, Liu J, Gu M, Sun S, Xu G** (2015) The characterization of six auxin-induced tomato GH3 genes uncovers a member, *SIGH3.4*, strongly responsive to arbuscular mycorrhizal symbiosis. *Plant & Cell Physiology* **56**: 674-687
- Martínez CIM**. 2018. *Ethylene signal transduction during climacteric tomato fruit ripening*. PhD thesis, KU Leuven University, Leuven, Belgium.
- Molinari S, Fanelli E, Leonetti P** (2014) Expression of tomato salicylic acid (SA)-responsive pathogenesis-related genes in *Mi-1*-mediated and SA-induced resistance to root-knot nematodes. *Molecular Plant Pathology* **15**: 255-264
- Ricardi MM, González RM, Iusem ND** (2010) Protocol: fine-tuning of a Chromatin Immunoprecipitation (ChIP) protocol in tomato. *Plant Methods* **6**: 11
- Song YY, Zeng RS, Xu JF, Li J, Shen X, Yihdego WG** (2010) Interplant communication of tomato plants through underground common mycorrhizal networks. *PLoS One* **5**: 1-11
- Sun YC, Pan LL, Ying FZ, Li P, Wang XW, Liu SS** (2017) Jasmonic acid-related resistance in tomato mediates interactions between whitefly and whitefly-transmitted virus. *Scientific Reports* **7**: 566
